# Supplementary material for: Predicting Frailty and Geriatric Interventions in Older Cancer Patients: Performance of Two Screening Tools for Seven Frailty Definitions—ELCAPA Cohort
Source: MDPI journal article supplement (doi:10.3390/cancers14010244), 2022-01-04
Supplement: s1 [file s1]

**Supplementary Table S1.** Frailty classification approaches (fit vs. “unfit”) and indicators according to the Balducci and International Society of Geriatric Oncology (SIOG) task force classifications.

| Classifications                                                   | Indicators used to classify patients as fit or unfit | Fit     | Unfit <sup>a</sup> |
|-------------------------------------------------------------------|------------------------------------------------------|---------|--------------------|
| <i>Balducci &amp; Extermann, 2000; Balducci &amp; Beghe, 2000</i> |                                                      |         |                    |
|                                                                   | ADL (Katz)                                           | 6/6 and | ≤5/6 and/or        |
|                                                                   | IADL (Lawton)                                        | 8/8 and | ≤7/8 and/or        |
|                                                                   | Comorbidities grade 3/4                              | 0 and   | ≥1 and/or          |
|                                                                   | Geriatric syndromes <sup>b</sup>                     | 0       | ≥ 1                |
| <i>Droz et al. (SIOG), 2010</i>                                   |                                                      |         |                    |
|                                                                   | ADL (Katz)                                           | 6/6 and | ≤ 5/6 and/or       |
|                                                                   | IADL (Lawton) <sup>c</sup>                           | 8/8 and | ≤ 7/8 and/or       |
|                                                                   | Comorbidities grade 3/4                              | 0 and   | ≥1 and/or          |
|                                                                   | Malnutrition <sup>d</sup>                            | absence | at risk/severe     |

<sup>a</sup> vulnerable, frail or too sick

<sup>b</sup> among dementia (Mini-Mental State Examination score [MMSE] ≤23/30), delirium, depression (diagnosed by a semi-structured interview to identify criteria for a major depressive episode from the Diagnostic and Statistical Manual of Mental Disorders [DSM-IV]), urinary and/or fecal incontinence and falls (≥ 1 fall in the last 6 months).

<sup>c</sup> in sensitivity analysis, we considered the 4-item IADL for men: ability to manage money, manage medications, use transportation, and use the telephone.

<sup>d</sup> absence: <10% of weight loss in the past 6 months and <5% in the last month; at risk: 10–15% weight loss in the past 6 months and/or 5–10% in the last month; severe malnutrition: ≥15% weight loss in the past 6 months and/or ≥10% in the last month.

**Supplementary Table S2.** Variables and definitions used to classify patients in the latent class typology

| Variable                                | Definition                                                                                                                                                                                                                                                                                        |
|-----------------------------------------|---------------------------------------------------------------------------------------------------------------------------------------------------------------------------------------------------------------------------------------------------------------------------------------------------|
| Inadequate social environment           | Absence of a primary caregiver or of adequate support at home or of a strong circle of family and friends able to meet the needs of the patient at the time of the evaluation                                                                                                                     |
| Malnutrition                            | One or more of the following criteria as recommended by the French National Authority for Health: at least 10% weight loss in 6 months or 5% in 1 month and/or body mass index < 21 kg/m <sup>2</sup> and/or Mini-Nutritional Assessment (MNA) score < 17/30 and/or serum albumin level < 35 g/L) |
| Depression                              | Diagnosed by semi-structured interview to identify criteria for a major depressive episode from the Diagnostic and Statistical Manual of Mental Disorders (DSM-IV)                                                                                                                                |
| Cognitive impairment                    | Mini-Mental State Examination score (MMSE) ≤ 23/30                                                                                                                                                                                                                                                |
| No. of severe (grade 3/4) comorbidities | Assessed by the Cumulative Illness Rating Scale for Geriatrics (CIRS-G; 0,1 ≥2)                                                                                                                                                                                                                   |
| Functional impairment                   | Activities of Daily Living score (ADL) ≤5/6                                                                                                                                                                                                                                                       |
| Age                                     | In two classes: ≤80 years; >80 years                                                                                                                                                                                                                                                              |
| Tumor site                              | Colorectal, upper gastrointestinal tract and liver, breast, prostate, other urologic malignancies, hematologic malignancies, other                                                                                                                                                                |
| Metastatic status                       | M0, absence of distant metastases; M1, presence of distant metastases; Mx, metastatic status unknown / NA, not applicable                                                                                                                                                                         |
| Status at the time of the GA            | In/outpatient                                                                                                                                                                                                                                                                                     |

Scoring rules are applied to classify patients into one of four profiles: Class 1, relatively healthy; Class 2, malnourished; Class 3, cognitive and mood impaired; Class 4, globally impaired.

**Supplementary Table S3.** Variables Included in the Frailty Index (N = 52 health deficits included)

| Deficit count | Variable                                         | Code                              |
|---------------|--------------------------------------------------|-----------------------------------|
| 1             | Assistance in bathing                            | 0: No ; 0.5: Little ; 1:Yes       |
| 2             | Assistance in getting dressed                    | 0: No ; 0.5: Little ; 1:Yes       |
| 3             | Problems carrying out personal grooming          | 0: No ; 1:Yes                     |
| 4             | Help using telephone                             | 0: No ; 1:Yes                     |
| 5             | Help taking Medications                          | 0: No ; 1:Yes                     |
| 6             | Help with Finances                               | 0: No ; 1:Yes                     |
| 7             | Toileting problems                               | 0: No ; 0.5: Little ; 1:Yes       |
| 8             | Urinary incontinence                             | 0: No ; 0.5: Occasionally ; 1:Yes |
| 9             | Bulk difficulties                                | 0: No ; 1:Yes                     |
| 10            | Diarrhea                                         | 0: No ; 1:Yes                     |
| 11            | Problems for cooking                             | 0: No ; 1:Yes                     |
| 12            | Feeding problems                                 | 0: No ; 0.5: Little ; 1:Yes       |
| 13            | Swallowing difficulties                          | 0: No ; 1:Yes                     |
| 14            | Anorexia (loss of appetite)                      | 0: No ; 0.5: Mild ; 1: Severe     |
| 15            | Malnutrition                                     | 0: No ; 1:Yes                     |
| 16            | Mid-Arm Circumference (cm)                       | 0: >22 ; 0.5: 21-22 ; 1:<21       |
| 17            | Low Calf Circumference (<31cm)                   | 0: No ; 1:Yes                     |
| 18            | Poor Dentition                                   | 0: No ; 1:Yes                     |
| 19            | Recent weight loss                               | 0: No ; 0.5: 1–3kg ; 1: >3kg      |
| 20            | Assistance getting in and out of a chair or bed  | 0: No ; 0.5: Little ; 1:Yes       |
| 21            | Problems walking around home                     | 0: No ; 1:Yes                     |
| 22            | Help with transportation                         | 0: No ; 1:Yes                     |
| 23            | Impaired mobility                                | 0: No ; 1:Yes                     |
| 24            | Musculoskeletal problems                         | 0: No ; 1:Yes                     |
| 25            | Single-leg stance $\geq 5$ seconds               | 0: No ; 1:Yes                     |
| 26            | Timed Up-and-Go test >20 sec.                    | 0: No ; 1:Yes                     |
| 27            | Fall risk (TUG score)                            | 0: No ; 1:Yes                     |
| 28            | Fall(s) in the 6 past months                     | 0: No ; 1:Yes                     |
| 29            | Mood problems (mini-GDS $\geq 1$ )               | 0: No ; 1:Yes                     |
| 30            | Feeling sad, blue, depressed                     | 0: No ; 1:Yes                     |
| 31            | Asthenia                                         | 0: No ; 1:Yes                     |
| 32            | Depression (clinical diagnosis)                  | 0: No ; 1:Yes                     |
| 33            | Memory complains                                 | 0: No ; 1:Yes                     |
| 34            | Cognitive disorders                              | 0: No ; 1:Yes                     |
| 35            | Cognitive impairment (MMSE $\leq 23$ )           | 0: No ; 1:Yes                     |
| 36            | History relevant to cognitive impairment or loss | 0: No ; 1:Yes                     |
| 37            | Neurological problems                            | 0: No ; 1:Yes                     |
| 38            | Hearing difficulty                               | 0: No ; 1:Yes                     |
| 39            | Vision problems                                  | 0: No ; 1:Yes                     |
| 40            | Metastases                                       | 0: No ; 1:Yes                     |
| 41            | Self-rated health status                         | 0: Good ; 0.5: Fair ; 1: Poor     |
| 42            | Pain related to cancer or other                  | 0: No ; 1:Yes                     |
| 43            | Sleeping disorders                               | 0: No ; 1:Yes                     |
| 44            | Diabetes mellitus                                | 0: No ; 1:Yes                     |
| 45            | Arterial hypertension                            | 0: No ; 1:Yes                     |
| 46            | Heart failure                                    | 0: No ; 1:Yes                     |
| 47            | Coronary Heart Disease                           | 0: No ; 1:Yes                     |

|    |                             |               |
|----|-----------------------------|---------------|
| 48 | Heart rhythm disorder       | 0: No ; 1:Yes |
| 49 | Dyslipidemia                | 0: No ; 1:Yes |
| 50 | Chronic respiratory failure | 0: No ; 1:Yes |
| 51 | Chronic renal failure       | 0: No ; 1:Yes |
| 52 | Chronic liver failure       | 0: No ; 1:Yes |

**Supplementary Table S4.** G8 screening questionnaire

| Items                                                                                                                               | Score                                                                                                     |
|-------------------------------------------------------------------------------------------------------------------------------------|-----------------------------------------------------------------------------------------------------------|
| Has food intake declined over the past 3 months due to loss of appetite, digestive problems, or chewing or swallowing difficulties? | 0: severe decrease in food intake<br>1: moderate decrease in food intake<br>2: no decrease in food intake |
| Weight loss during the last 3 months                                                                                                | 0: weight loss > 3kg<br>1: does not know<br>2: weight loss between 1 and 3 kg<br>3: no weight loss        |
| Mobility                                                                                                                            | 0: bed or chair bound<br>1: able to get out of bed/chair but does not go out<br>2: goes out               |
| Neuropsychological problems                                                                                                         | 0: severe dementia or depression<br>1: mild dementia or depression<br>2: no psychological problems        |
| Body mass index (BMI weight in kg/height in m <sup>2</sup> )                                                                        | 0: BMI < 18.5<br>1: BMI = 18.5 to BMI < 21<br>2: BMI = 21 to BMI < 23<br>3: BMI = 23 and >23              |
| Takes more than 3 prescription drugs per day                                                                                        | 0: yes<br>1: no                                                                                           |
| Compared with other people of the same age, how does the patient rate his or her health status?                                     | 0: not as good<br>0.5: does not know<br>1: as good<br>2: better                                           |
| Age                                                                                                                                 | 0: > 85 years<br>1: 80-85 years<br>2: < 85 years                                                          |
| <b>Total Score</b>                                                                                                                  | <b>0–17</b>                                                                                               |

**Supplementary Table S5.** Modified-G8 screening questionnaire

| Items                                                                                           | Score                                                                                                                                                                                                                                                                   |
|-------------------------------------------------------------------------------------------------|-------------------------------------------------------------------------------------------------------------------------------------------------------------------------------------------------------------------------------------------------------------------------|
| Weight loss during the last 3 months                                                            | 10: weight loss > 3kg / does not know<br>2: weight loss between 1 and 3 kg<br>0: no weight loss                                                                                                                                                                         |
| Neuropsychological problems                                                                     | 3: mild / severe dementia or depression<br>0: no psychological problems                                                                                                                                                                                                 |
| Takes at least 6 prescription drugs per day                                                     | 2: yes<br>0: no                                                                                                                                                                                                                                                         |
| Compared with other people of the same age, how does the patient rate his or her health status? | 3: not as good / does not know<br>0: as good or better                                                                                                                                                                                                                  |
| Performance Status (PS)                                                                         | 12: PS 2, 3 or 4 (ambulatory but unable to carry out any work activities / confined to bed >50% / disabled)<br>4: PS 1 (restricted in physically strenuous activity but ambulatory and able to carry out work of a light or sedentary nature)<br>0: PS 0 (fully active) |
| Past history of heart failure or coronary artery disease                                        | 5: yes<br>0: no                                                                                                                                                                                                                                                         |
| <b>Total Score</b>                                                                              | <b>0–35</b>                                                                                                                                                                                                                                                             |
